# Supplementary material for: Synthesis, structure and reactivity of azosalophen complexes of vanadium(IV): studies on cytotoxic properties
Source: Royal Society of Chemistry journal article supplement (doi:10.1039/b903352a), 2009-01-01
Supplement: b903352a.pdf [file b903352a.pdf]

## **SUPPLEMENTARY MATERIALS**

### **Synthesis, structure and reactivity of azosalophen complexes of Vanadium (IV): studies on cytotoxic properties**

**Poulami Pattanayak,<sup>a</sup> Jahar Lal Pratihari,<sup>a</sup> Debprasad Patra,<sup>a</sup> Soham Mitra,<sup>b</sup> Arindam Bhattacharyya,<sup>†c</sup> Hon Man Lee<sup>d</sup> and Surajit Chattopadhyay<sup>\*a</sup>**

<sup>a</sup>*Department of Chemistry, University of Kalyani, Kalyani – 741235, India*

<sup>b</sup>*Department of Environmental Science, University of Kalyani, Kalyani – 741235, India*

<sup>c</sup>*Department of Zoology, University of Calcutta, Kolkata, India*

<sup>d</sup>*Department of Chemistry, National Changhua University of Education, Changhua – 50058, Taiwan*

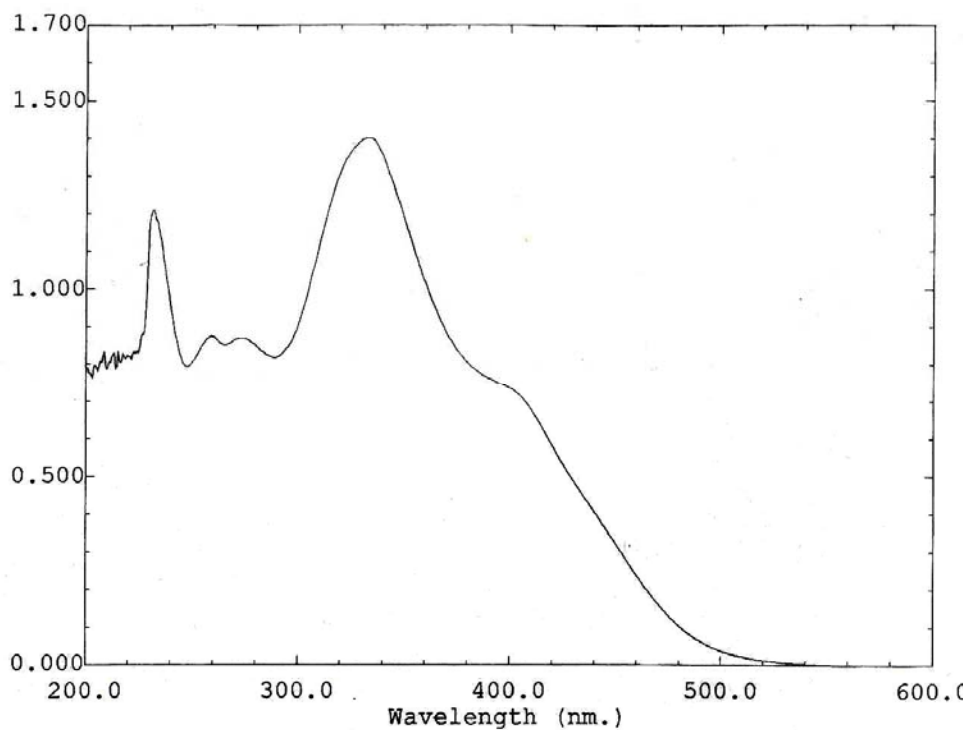

**Fig. S1.** UV-vis spectrum of H<sub>2</sub>L<sup>2</sup>

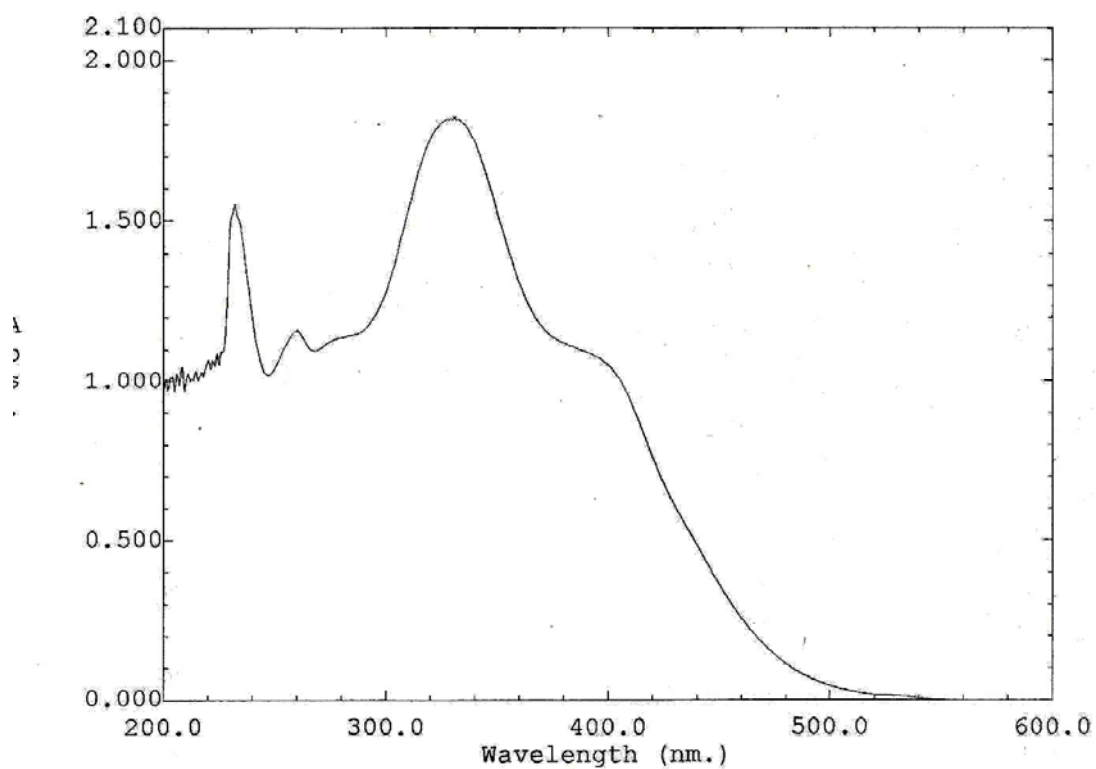

**Fig. S2.** UV-vis spectrum of  $H_2L^3$

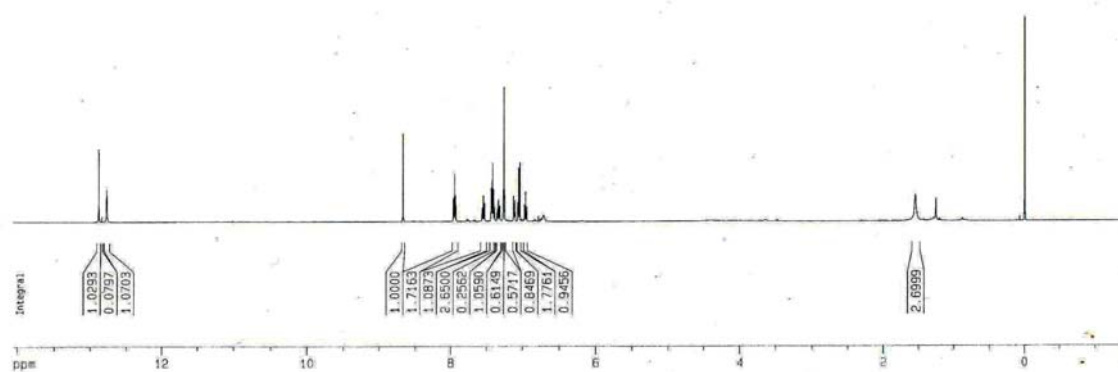

**Fig. S3.**  $^1H$  NMR spectrum of  $H_2L^1$

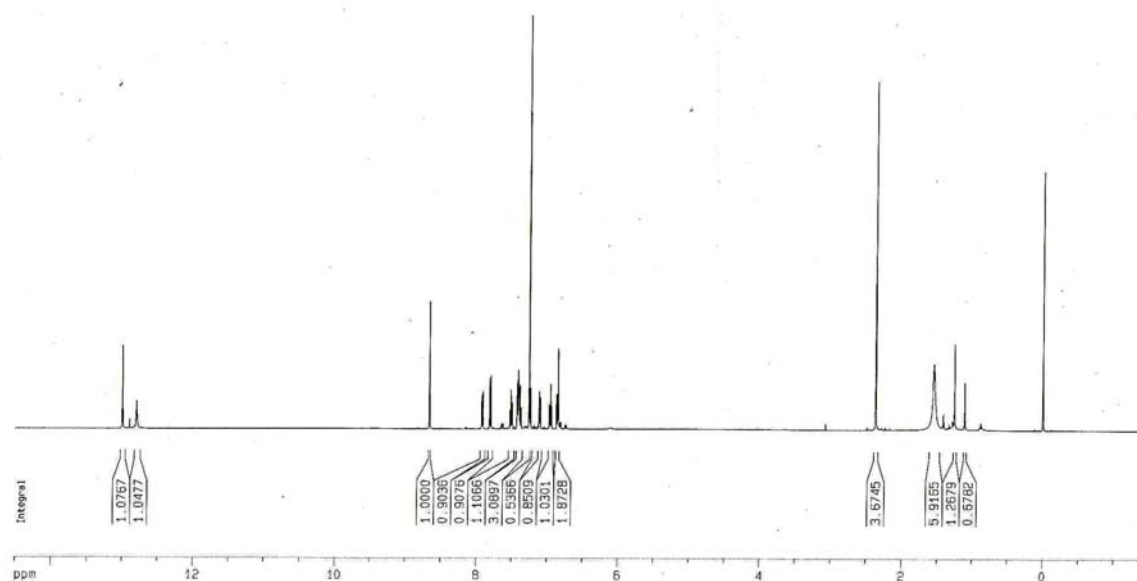

**Fig. S4.**  $^1H$  NMR spectrum of  $H_2L^2$

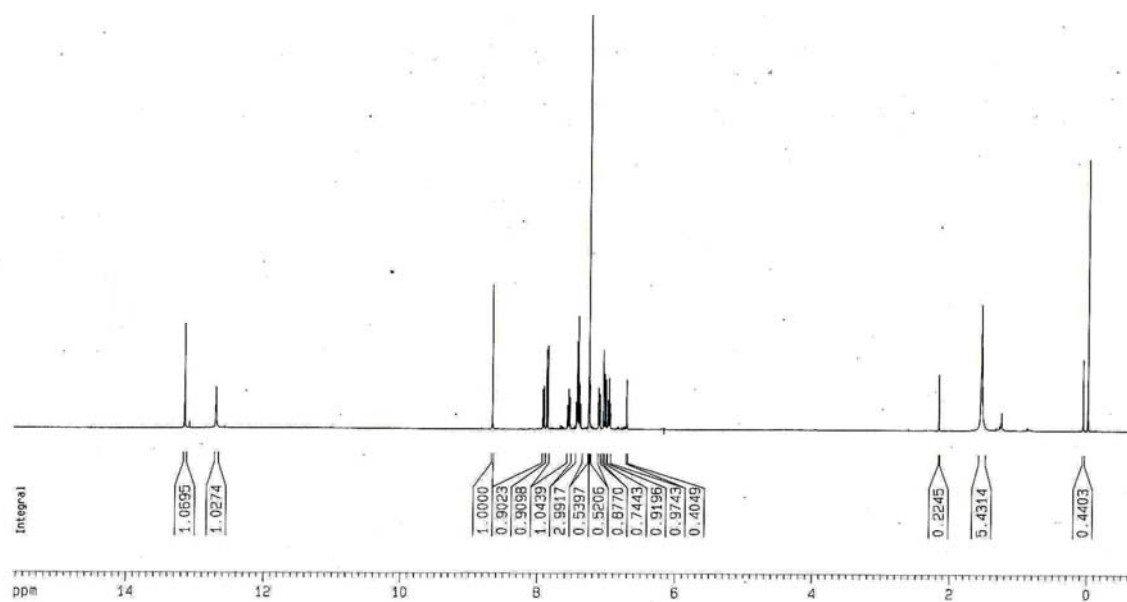

**Fig. S5.**  $^1H$  NMR spectrum of  $H_2L^3$

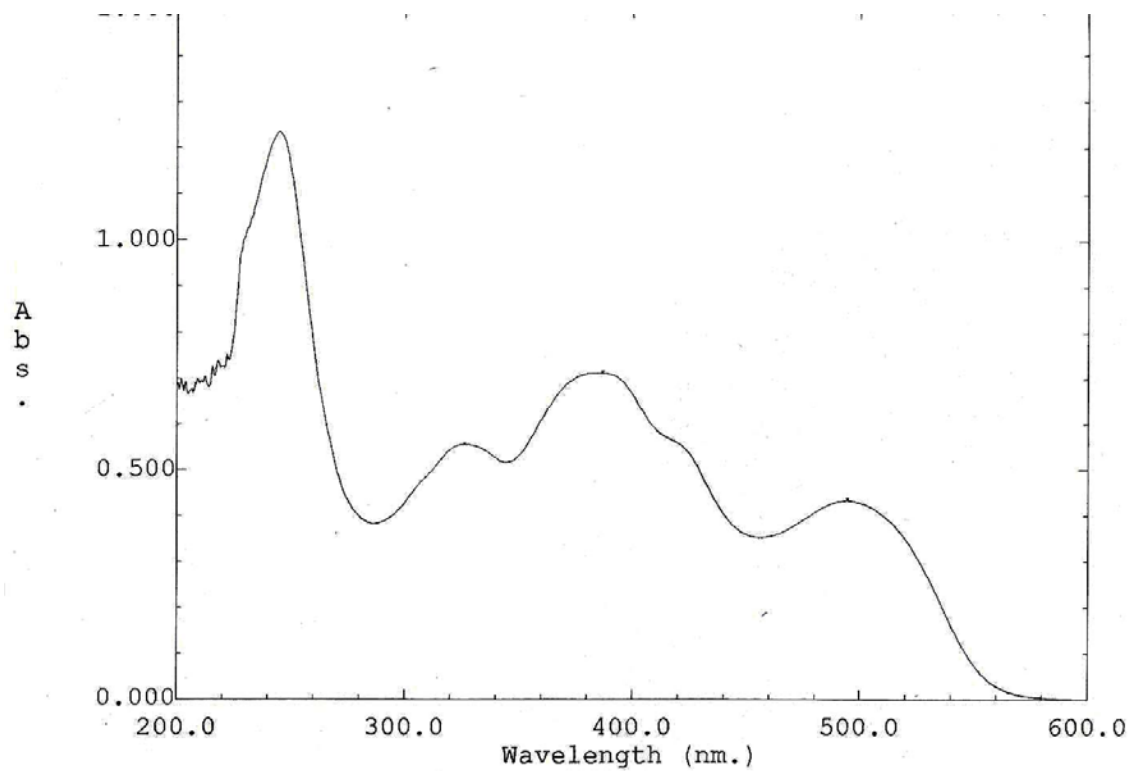

**Fig. S6.** UV-vis spectrum of  $(L^2)V(O)(H_2O)$

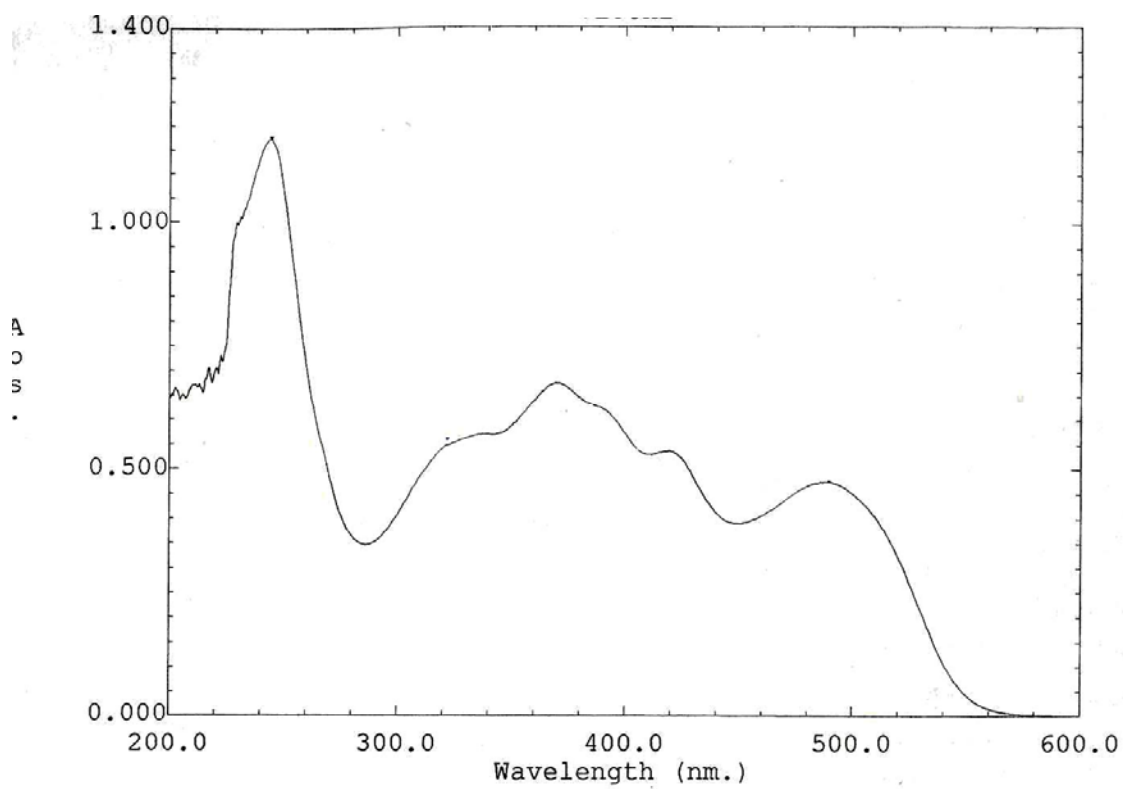

**Fig. S7.** UV-vis spectrum of  $(L^3)V(O)(H_2O)$

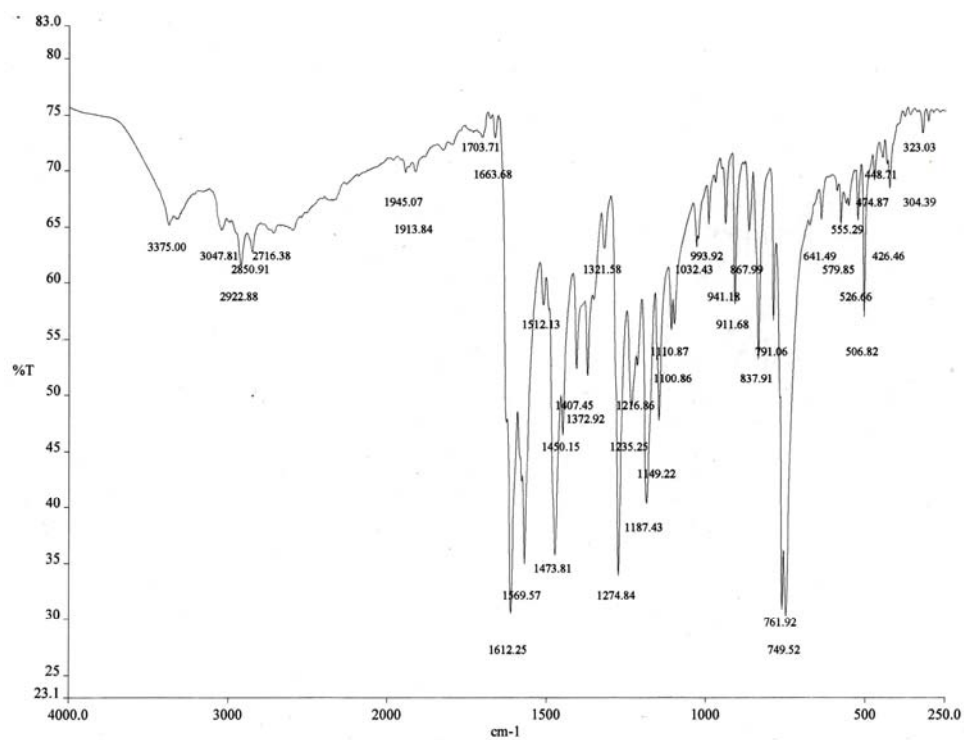

**Fig. S8.** IR spectrum of  $H_2L^1$

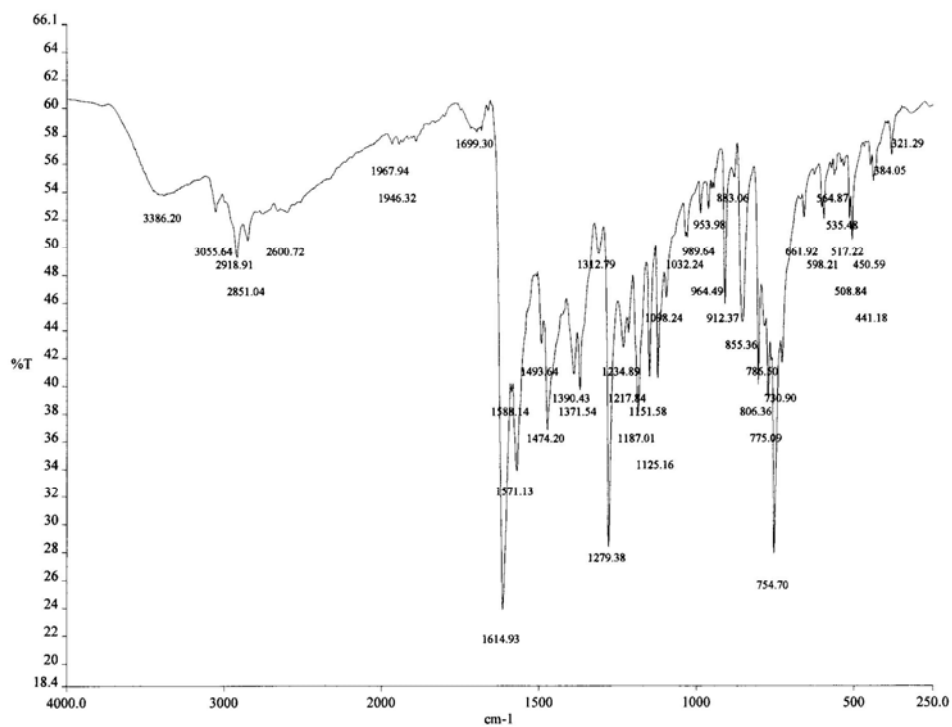

**Fig. S9.** IR spectrum of  $H_2L^2$

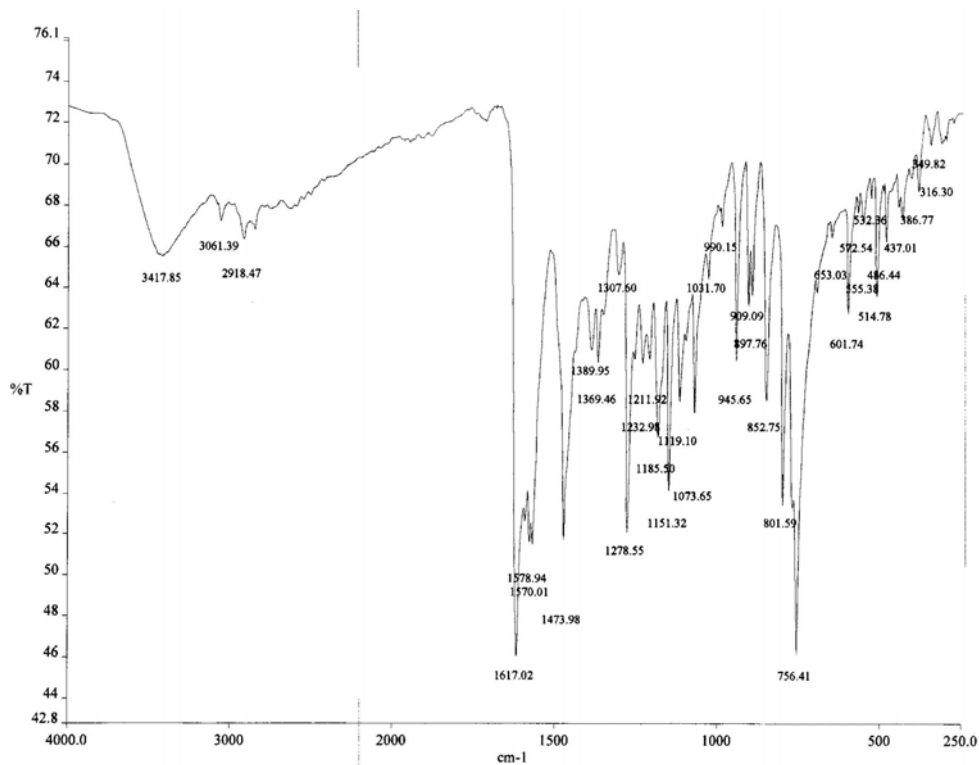

**Fig. S10.** IR spectrum of  $H_2L^3$

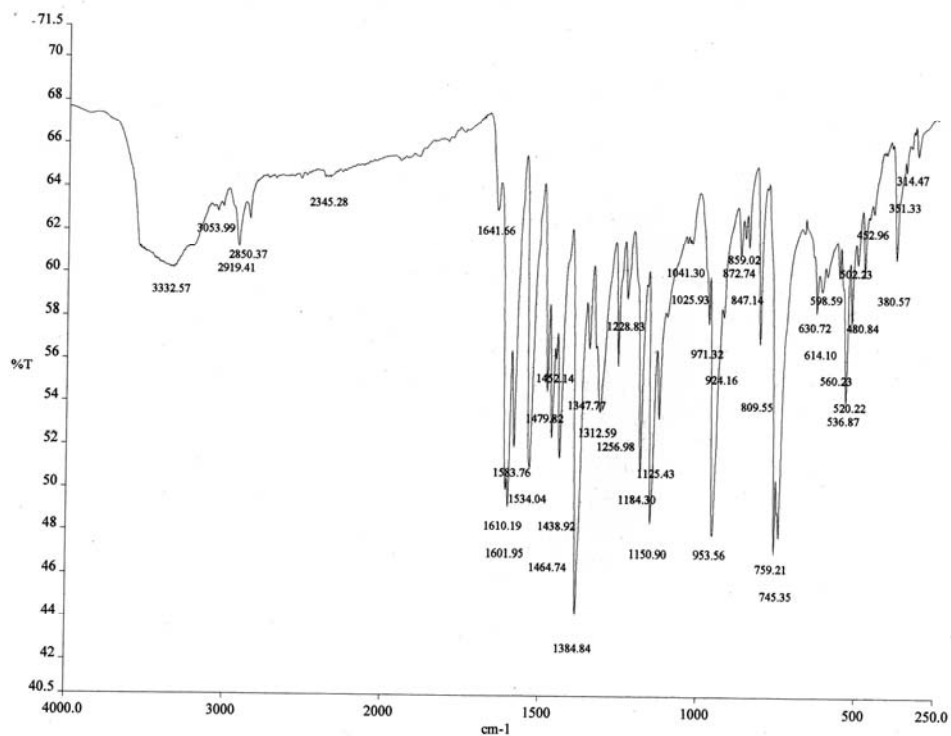

**Fig. S11.** IR spectrum of  $(L^1)V(O)(H_2O)$

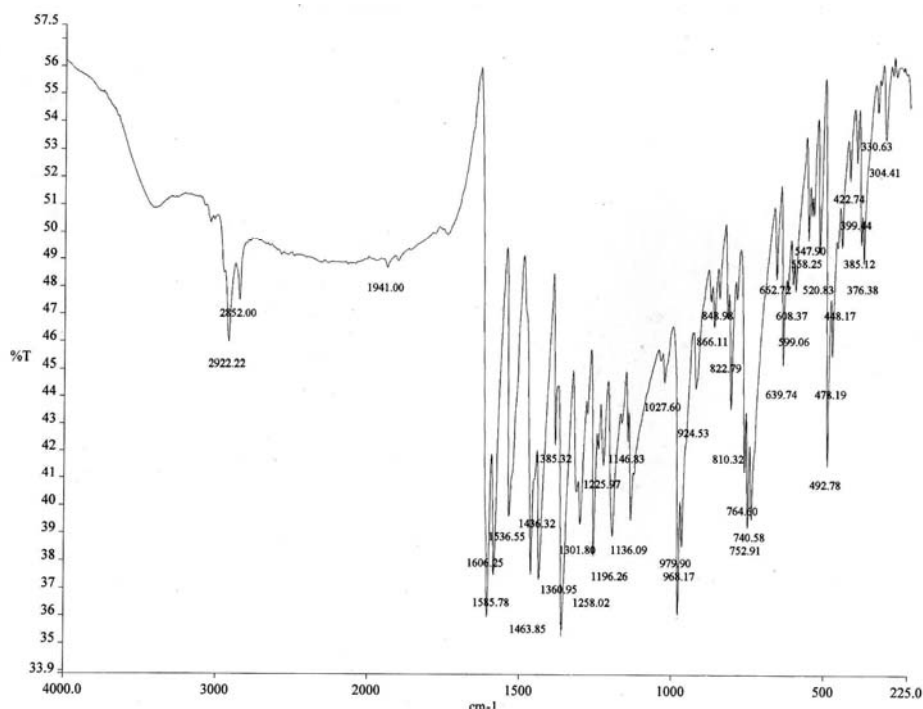

**Fig. S12.** IR spectrum of  $(L^2)V(O)(H_2O)$

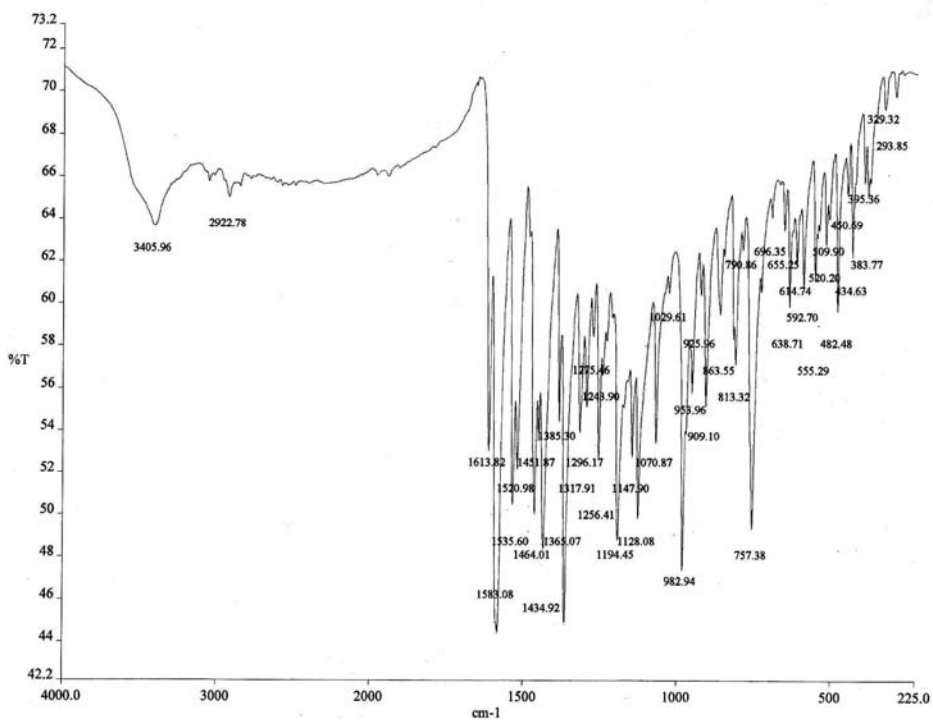

**Fig. S13.** IR spectrum of  $(L^3)V(O)(H_2O)$

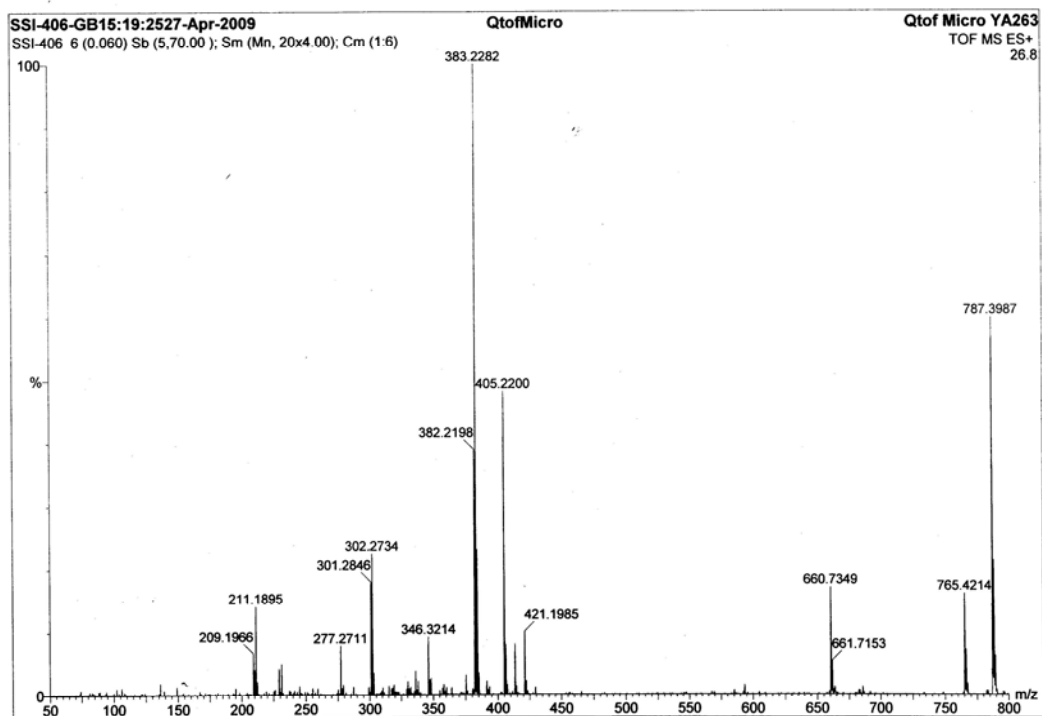

**Fig. S14.** ESI Mass spectrum of  $(L^1)V(O)(H_2O)$
